# Supplementary material for: Decoding the biogenesis of HIV-induced CPSF6 puncta and their fusion with nuclear speckles
Source: eLife journal article supplement (doi:10.7554/elife.103725), 2024-12-27
Supplement: fig3-data3 [file Figure 3 WB annotated.pdf › Figure 3-source data 3/Figure 3 WB annotated.pdf]

**INPUT**

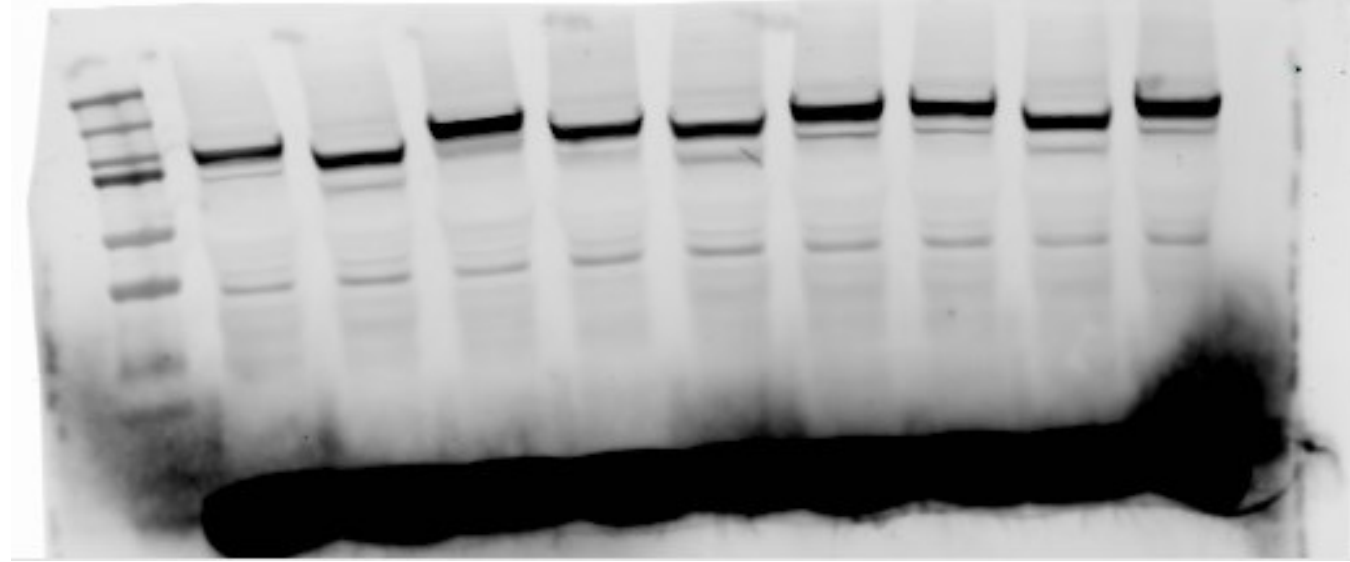

**CPSF6 WT**

**CPSF6  $\Delta$ FG  $\Delta$ LCR**

**CPSF6 ADD2  $\Delta$ LCR**

**CPSF6 3xNLS  $\Delta$ MCD**

**CPSF6  $\Delta$ LCR**

**CPSF6  $\Delta$ FG**

**WB: anti-neon-GFP**

|              |                 |   |                                           |   |                                          |   |                                                           |   |
|--------------|-----------------|---|-------------------------------------------|---|------------------------------------------|---|-----------------------------------------------------------|---|
|              | <b>CPSF6 WT</b> |   | <b>CPSF6 3xNLS <math>\Delta</math>MCD</b> |   | <b>CPSF6 ADD2 <math>\Delta</math>LCR</b> |   | <b>CPSF6 <math>\Delta</math>FG <math>\Delta</math>LCR</b> |   |
| <b>PF74:</b> | -               | + | -                                         | + | -                                        | + | -                                                         | + |

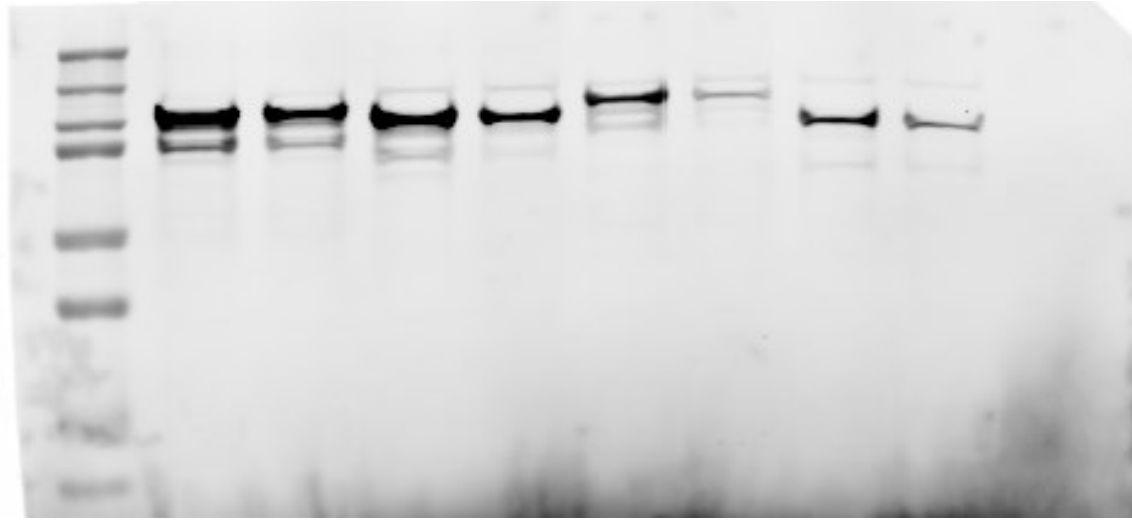

WB: anti-neon-GFP

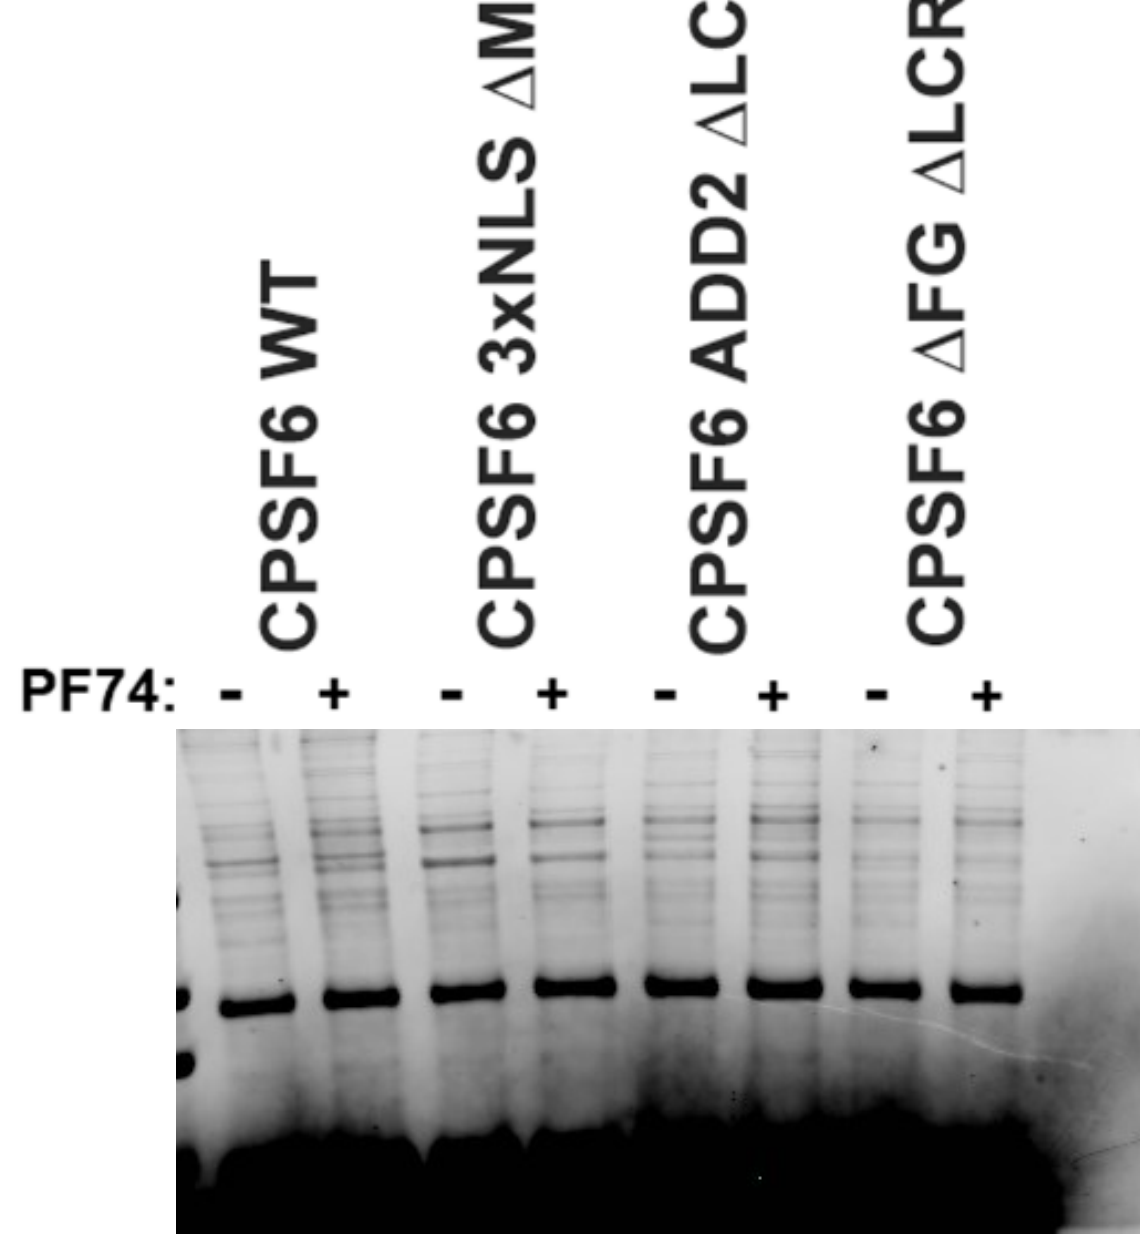

WB: anti-p24

**CPSF6 WT**  
**CPSF6  $\Delta$ LCR**  
**CPSF6  $\Delta$ FG**

**PF74: - + - + - +**

**WB: anti-neon-GFP**

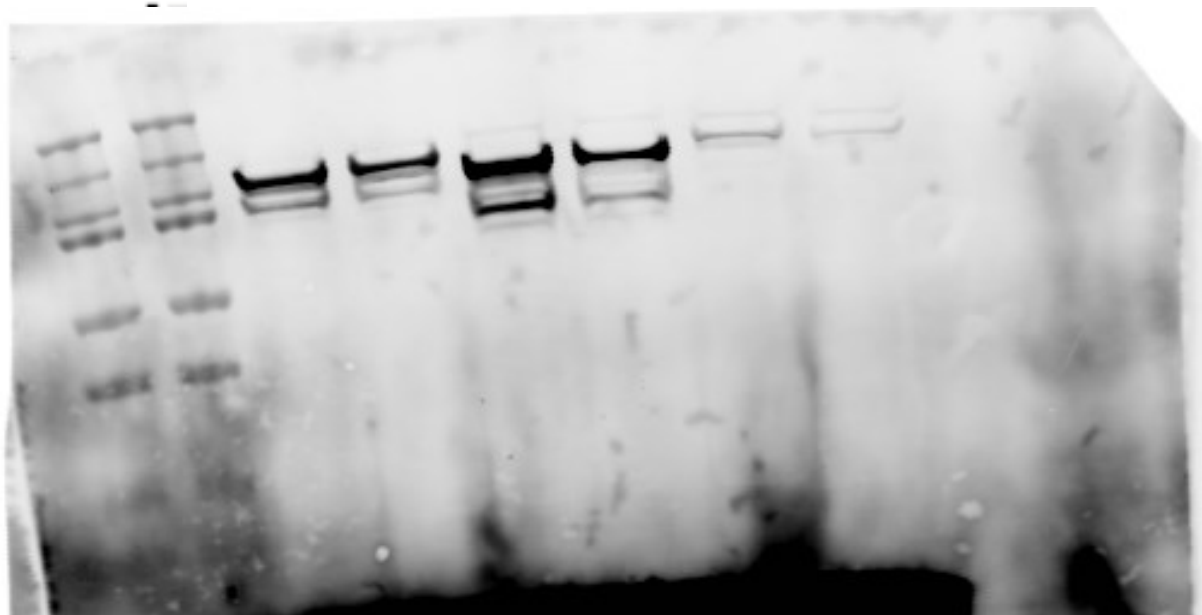

PF74:      -    +      -    +      -    +  
                 CPSF6 WT      CPSF6  $\Delta$ LCR      CPSF6  $\Delta$ FG

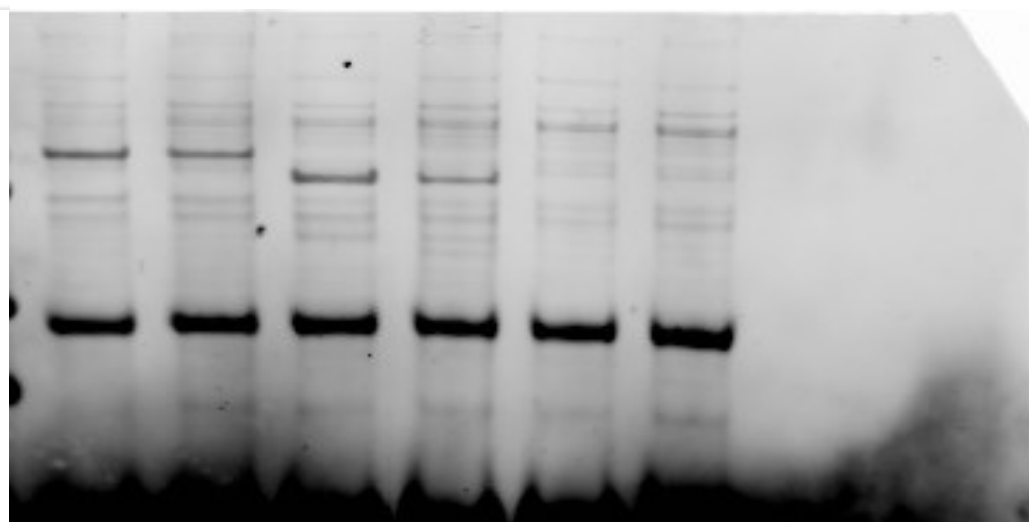

WB: anti-p24
