# Supplementary material for: Decoding the biogenesis of HIV-induced CPSF6 puncta and their fusion with nuclear speckles
Source: eLife. 2026 Jan 6;13:RP103725. doi: 10.7554/eLife.103725 (PMC12774418; doi:10.7554/eLife.103725)
Supplement: Figure 1—source data 1. [file elife-103725-fig1-data1.xlsx]

## Sheet: Fig.1B
HIV-Luc				HIV-Luc+NVP				HIV-Luc+NEV w/o				HIV-Luc+NEV w/o + PF74																HIV-LucN74D+NEV w/o + PF74
4.85405e+06	4.80191e+06	3.73075e+06	3.76976e+06	1476.49	1535.4	1511.81	1701.4	1.5431e+06	1.50153e+06	1.70661e+06	1.56994e+06	1061.07	547.409	863.265	368.208													11794.7	10707.8	12396.7	12370.1

## Sheet: Fig.1C-left
THP-1	THP-1 CRISPR-Cas9 Ctrl	THP-1 CRISPR-Cas6 CPSF6
1	1.03331	0.40763

## Sheet: Fig.1C-right
Ctrl 1	Ctrl2	CPSF6 KO A	CPSF6 KO B	CPSF6 KO 1	CPSF6 KO 2	CPSF6 KO 3	CPSF6 KO 4	CPSF6 KO 5
1	0.947989	0.933711	1.05846	0.859884	0.174544	0.585839	0	0.537303
