# Supplementary material for: Decoding the biogenesis of HIV-induced CPSF6 puncta and their fusion with nuclear speckles
Source: eLife. 2026 Jan 6;13:RP103725. doi: 10.7554/eLife.103725 (PMC12774418; doi:10.7554/eLife.103725)
Supplement: Figure 2—source data 1. [file elife-103725-fig2-data1.xlsx]

## Sheet: Fig.2C
CPSF6 WT	CPSF6 WT + HIV	CPSF6 ΔFG ΔLCR	CPSF6 ΔFG ΔLCR+ HIV	CPSF6 ADD2 ΔLCR	CPSF6 ADD2 ΔLCR+ HIV	CPSF6 3xNLS ΔMCD	CPSF6 3xNLS ΔMCD + HIV	CPSF6 ΔLCR	CPSF6 ΔLCR + HIV	CPSF6 ΔFG	CPSF6 ΔFG + HIV
0	3	0	0	0	4	0	0	0	0	0	0
0	3	0	2	0	1	0	1	0	3	0	1
0	1	0	0	0	0	0	2	0	2	0	0
0	0	0	0	0	0	1	3	0	2	0	0
0	4	0	0	0	0	0	4	0	14	0	0
1	6	0	7	0	1	0	6	1	0	1	2
1	1	0	0	0	0	0	8	1	1	0	2
0	2	0	0	0	2	1	0	0	1	0	1
0	2	0	0	0	0	1	0	0	2	0	1
0	4	0	0	0	0	0	5	0	0	0	0
0	0	0	2	0	0	0	2	0	0	0	1
0	1	0	2	0	1	0	0	1	0	0	4
1	1	0	2	0	1	1	0	0	0	0	1
0	5	0	2	0	0	0	1	0	7	0	0
0	9	0	1	0	0	2	3	0	0	0	1
2	0	0	0	0	0	0	5	0	0	0	4
0	1	0	0	0	0	0	0	0	0	0	4
0	2	0	0	0	0	3	2	0	3	0	0
0	3	0	0	0	2	4	2	0	7	1	0
0	2	0	3	0	2	0	2	0	5	0	0
0	10	0	2	0	2	1	1	0	5	0	0
1	0	0	2		6	0	2	0	6	0	0
2	5	0	3		0	0	2	0	9	0	0
0	3	0	4		0	2	5	1	2	0	0
0	17	0	0		0	0	4	1	1	0	0
2	3	0	0	0	1	0	0	0	0	0	1
0	4	0	0	0	2	0	1	0	0	0	0
0	5	0	0	0	0	0	4	0	4	0	0
0	4	0	2	0	1	0	0	0	4	0	0
0	1	0	0	0	0	0	0	0	5	0	3
0	4	0	3	0	0	0	9	0	0	0	0
0	2	0	5	0	0	0	8	0	0	0	2
0	3	0	6	0	0	0	1	0	3	0	2
0	12	0	4	0	0	0	1	0	3	0	0
0	4	0	7	0	4	0	0	0	3	0	1
0	6	0	6	0	0	0	0	0	4	0	0
0	0	0	2	0	0	0	2	2	4	0	0
0	7	0	0	0	0	2	2	1	9	0	0
0	4	0	0	0	0	1	5	3	19	0	0
0	3	0	0	0	0	1	0	0	3	0	0
0	4	0	0	0	0	2	0	0	13	0	0
0	0	0	0	0	0	0	5	0	0	0	1
0	5	0	0	0	4	0	4	2	0	0	2
0	5	0	0	0	0	0	4	3	0	0	2
0	12	0	0	0	0	0	6	0	0	0	2
1	9	0	0	0	0	1	5	0	0	0	0
0	11	0	3	0	0	0	0	0	1	0	3
0	0	0	4	0	3	0	2	0	0	0	7
0	0	0	5	0	4	0	4	0	0	0	1
0	9	0	4	0	0	0	3	0	0	0	1
0	4	0	2	0	0	0	6	0	6	1	2
0	7	0	0	0	4	0	5	0	3	0	0
0	1	0	0	0	4	0	4	1	0	0	0
0	2	0	0	0	4	0	4	0	6	0	0
0	4	0	1	0	0	1	8	1	11	1	3
0	4	1	7	0	4	0	4	0	3	0	0
0	2	0	0	0	0	0	0	0	0	0	0
0	2	0	0	0	0	0	0	3	0	0	0
0	2	0	0	0	0	0	0	0	2	0	0
0	2	0	0	0	0	0	4	0	2	1	0
0	2	0	0	0	3	0	3	0	1	0	1
0	4		0	0	0	0	4	1	0	0	0
0	5	0	2	0	0	9	3	0	7	2	1
0	0	0	1	0	0	0	4	0	9	0	0
0	3	0	0	0	0	1	5	0	1	0	9
0	1	0	0	0	2	0	5	0	1	0	9
0	7	0	0	0	3	0	2	0	0	0	0
1	5	0	2	0	3	0	2	1	0	0	0
0	7	0	2	0	0	0	1	0	0	0	1
0	3	0	2	0	0	3	16	1	0	0	0
0	8	0	8	0	0	3	3	0	0	0	0
0	17		0	0	0	0	4		2	0	4
0	13		1	0	0	0	5		12	0	0
0	14		0	1	1	0	10		0	0	0
0	5		0		1	1	4		4	0	2
0	16		1		0	1	6		4	0	0
0	11		0		0		8		3	0	5
0	6		0		0		11		1	0	1
0	5		0		0		1		1		0
0	2		0		0		3		4		2
0	1		0		0		4		0		2
0	3		0		0		2		0		2
	2		2		0		1		5		0
	2		1		4		5		4		0
	5		0		0		4		5		2
	4		0		0		5		1		4
	2		2		2		3		7		0
	6		4		2		1		9		0
	2		4		0		0		3		0
	3		0		0		1		2		0
	2		2		1		13		0		0
	6		2		0		5		18		0
	10		2		0		4		0		0
	0		2		0		5		0		0
	2		0		1		1		2		0
	4		0		3		3		0		4
	1		0		1		1		0		3
	3		0		0		9		3		5
	7		0		0		6		3		0
	9		0		0				3		2
	4		0		0				7		0
	1		0		1				12		1
	5		2		0				0		0
	3		0		2				5		0
	5				1				6		1
	3				0				3		1
	0				0				3		0
	4				0						0
	10				0						0
	3				0						0
					0						0
					0						0
					1

## Sheet: Fig.2D
CPSF6 WT	CPDF6 ΔFG ΔLCR	CPSF6 ADD2 ΔLCR	CPSF6 3xNLSΔMCD	CPSF6 ΔLCR	CPSF6 ΔFG
3	0	4	0	0	0
3	2	1	1	3	1
1	0	0	2	2	0
0	0	0	3	2	0
4	0	0	4	14	0
6	7	1	6	0	2
1	0	0	8	1	2
2	0	2	0	1	1
2	0	0	0	2	1
4	0	0	5	0	0
0	2	0	2	0	1
1	2	1	0	0	4
1	2	1	0	0	1
5	2	0	1	7	0
9	1	0	3	0	1
0	0	0	5	0	4
1	0	0	0	0	4
2	0	0	2	3	0
3	0	2	2	7	0
2	3	2	2	5	0
10	2	2	1	5	0
0	2	6	2	6	0
5	3	0	2	9	0
3	4	0	5	2	0
17	0	0	4	1	0
3	0	1	0	0	1
4	0	2	1	0	0
5	0	0	4	4	0
4	2	1	0	4	0
1	0	0	0	5	3
4	3	0	9	0	0
2	5	0	8	0	2
3	6	0	1	3	2
12	4	0	1	3	0
4	7	4	0	3	1
6	6	0	0	4	0
0	2	0	2	4	0
7	0	0	2	9	0
4	0	0	5	19	0
3	0	0	0	3	0
4	0	0	0	13	0
0	0	0	5	0	1
5	0	4	4	0	2
5	0	0	4	0	2
12	0	0	6	0	2
9	0	0	5	0	0
11	3	0	0	1	3
0	4	3	2	0	7
0	5	4	4	0	1
9	4	0	3	0	1
4	2	0	6	6	2
7	0	4	5	3	0
1	0	4	4	0	0
2	0	4	4	6	0
4	1	0	8	11	3
4	7	4	4	3	0
2	0	0	0	0	0
2	0	0	0	0	0
2	0	0	0	2	0
2	0	0	4	2	0
2	0	3	3	1	1
4	0	0	4	0	0
5	2	0	3	7	1
0	1	0	4	9	0
3	0	0	5	1	9
1	0	2	5	1	9
7	0	3	2	0	0
5	2	3	2	0	0
7	2	0	1	0	1
3	2	0	16	0	0
8	8	0	3	0	0
17	0	0	4	2	4
13	1	0	5	12	0
14	0	1	10	0	0
5	0	1	4	4	2
16	1	0	6	4	0
11	0	0	8	3	5
6	0	0	11	1	1
5	0	0	1	1	0
2	0	0	3	4	2
1	0	0	4	0	2
3	0	0	2	0	2
2	2	0	1	5	0
2	1	4	5	4	0
5	0	0	4	5	2
4	0	0	5	1	4
2	2	2	3	7	0
6	4	2	1	9	0
2	4	0	0	3	0
3	0	0	1	2	0
2	2	1	13	0	0
6	2	0	5	18	0
10	2	0	4	0	0
0	2	0	5	0	0
2	0	1	1	2	0
4	0	3	3	0	4
1	0	1	1	0	3
3	0	0	9	3	5
7	0	0	6	3	0
9	0	0		3	2
4	0	0		7	0
1	0	1		12	1
5	2	0		0	0
3	0	2		5	0
5		1		6	1
3		0		3	1
0		0		3	0
4		0			0
10		0			0
3		0			0
		0			0
		0			0
		1

## Sheet: Fig.2E
CPSF6 WT	CPSF6 3xNLS ΔMCD
100	100
100	100
100	75
100	100
100	100
50	100
80	83.3333
100	100
83.3333	100
100	100
50	100
50	100
0	100
50	100
100	100
0	100
100	100
100	100
66.6667	60
100	71.4286
100	100
100	100
100	50
100	100
66.6667	100
100	100
100	100
100	100
50	75
66.6667	75
100	100
100	100
100	100
100	100
100	100
100	50
80	100
50	100
50	100
100	75
100	85.7143
100	100
100	66.6667
100	0
40	0
100	100
100	100
85.7143	0
100	87.5
100	100
66.6667	100
100	50
100	100
66.6667	100
50	100
100	100
75	100
100	100
100	100
100	100
100	66.6667
	100
	80
	66.6667
	50
	100
	83.3333
	100
	66.6667
	100
	100
	100
	0
	100
	100
	100
	100
	0
	0
	100
	100
	100
	100
	100
	100
	100
	100
	100
