# Supplementary material for: Decoding the biogenesis of HIV-induced CPSF6 puncta and their fusion with nuclear speckles
Source: eLife. 2026 Jan 6;13:RP103725. doi: 10.7554/eLife.103725 (PMC12774418; doi:10.7554/eLife.103725)
Supplement: Figure 3—source data 1. [file elife-103725-fig3-data1.xlsx]

## Sheet: Sheet1
					DMSO			PF74
				CPSF6	100	0		41.3	12.3
				CPSF6 3xNLS ∆MCD	98.3	9.7		25.4	6.4
				CPSF6 ADD2 ∆LCR	15.3	4.5		3.2	1.2
				CPSF6 ∆FG ∆LCR	11.3	3.7		2.2	0.5
				CPSF6 ∆LCR	210	12.3		84	15.6
				CPSF6 ∆FG	1.3	0.4		0.7	0.3
