# Supplementary material for: Decoding the biogenesis of HIV-induced CPSF6 puncta and their fusion with nuclear speckles
Source: eLife. 2026 Jan 6;13:RP103725. doi: 10.7554/eLife.103725 (PMC12774418; doi:10.7554/eLife.103725)
Supplement: Figure 4—source data 1. [file elife-103725-fig4-data1.xlsx]

## Sheet: Fig.4A
N	Residue	ADD2	FG				N	Residue	LCR
1	D	0.9766					1	E	0.0149
2	G	0.9585					2	I	0.0246
3	E	0.9807					3	P	0.162
4	K	0.9879					4	I	0.2198
5	E	0.9865					5	F	0.2824
6	T	0.9887					6	G	0.3601
7	A	0.9902					7	L	0.4575
8	P	0.989					8	K	0.5454
9	E	0.9863					9	A	0.6298
10	E	0.9852					10	G	0.7072
11	P	0.9846					11	Q	0.7746
12	G	0.9851					12	T	0.8492
13	S	0.9855					13	P	0.8977
14	P	0.9857					14	P	0.9462
15	A	0.9837					15	R	0.9779
16	K	0.9864					16	P	0.9889
17	S	0.9895					17	P	0.9941
18	A	0.9927					18	L	0.9963
19	P	0.9864					19	G	0.999
20	A	0.9793					20	P	0.9997
21	S	0.971					21	P	0.9998
22	P	0.9531					22	G	0.9999
23	V	0.9489					23	P	0.9999
24	Q	0.9472					24	P	0.9999
25	S	0.946					25	G	0.9999
26	P	0.9438					26	P	0.9998
27	A	0.9271					27	P	0.9998
28	K	0.9177					28	G	0.9998
29	E	0.8677					29	P	0.9997
30	A	0.8432					30	P	0.9997
31	E	0.8362					31	P	0.9997
32	T	0.8138					32	P	0.9997
33	K	0.786					33	G	0.9997
34	S	0.7141					34	Q	0.9997
35	P	0.6432					35	V	0.9997
36	L	0.5636					36	L	0.9997
37	V	0.5076					37	P	0.9998
38	S	0.4686					38	P	0.9998
39	P	0.4134					39	P	0.9998
40	S	0.3935					40	L	0.9998
41	K	0.3574					41	A	0.9998
42	S	0.2948					42	G	0.9967
43	L	0.2896					43	P	0.9962
44	E	0.2919					44	P	0.995
45	E	0.3137					45	N	0.9923
46	G	0.3118					46	R	0.9896
47	T	0.3105					47	G	0.927
48	K	0.348					48	D	0.8676
49	K	0.3388					49	R	0.8069
50	T	0.3624					50	P	0.7463
51	E	0.382					51	P	0.6887
52	T	0.3536					52	P	0.6169
53	P	0.3177	1				53	P	0.5683
54	V	0.2873	1				54	V	0.5401
55	L	0.2569	1				55	L	0.5036
56	F	0.2608	1				56	F	0.5602
57	P	0.2167	1				57	P	0.6135
58	G	0.1732	1				58	G	0.6603
59	Q	0.1146	1				59	Q	0.707
60	P	0.0883	1				60	P	0.7538
61	F	0.1055	1				61	F	0.8232
62	G	0.1834	1				62	G	0.8725
63	Q	0.279	1				63	Q	0.9034
64	P	0.3677	1				64	P	0.9426
65	P	0.4446	1				65	P	0.9485
66	L	0.5276	1				66	L	0.9545
67	G	0.6114	1				67	G	0.9684
68	S	0.7045					68	P	0.9823
69	K	0.7996					69	L	0.9962
70	A	0.8815					70	P	0.9991
71	A	0.8977					71	P	0.9996
72	T	0.891					72	G	0.9996
73	T	0.8952					73	P	0.9997
74	E	0.8988					74	P	0.9998
75	P	0.8945					75	P	0.9998
76	E	0.8946					76	P	0.9999
77	T	0.8879					77	V	0.9999
78	T	0.883					78	P	0.9999
79	Q	0.8798					79	G	0.9999
80	P	0.8816					80	Y	0.9999
81	E	0.8837					81	G	0.9999
82	G	0.8801					82	P	0.9999
83	V	0.8709					83	P	0.9999
84	V	0.8513					84	P	0.9999
85	V	0.8316					85	G	0.9999
86	N	0.8403					86	P	0.9999
87	G	0.8514					87	P	0.9999
88	R	0.8622					88	P	0.9999
89	E	0.871					89	P	0.9998
90	E	0.8822					90	Q	0.9998
91	E	0.8857					91	Q	0.9998
92	Q	0.8729					92	G	0.9998
93	T	0.8453					93	P	0.9998
94	A	0.8245					94	P	0.9998
95	E	0.8822					95	P	0.9996
96	E	0.6751					96	P	0.9997
97	I	0.4316					97	P	0.9998
98	L	0.5117					98	G	0.9999

## Sheet: Fig.4F
% Proline-like LCR uncharged residus ( ~261-358 aa)	CPSF6 ΔLCR	CPSF6 ADD2 ΔLCR	CPSF6 WT	CPSF6 ΔFG	CPSF6 ΔFG ΔLCR	UniProtKB/Swiss-Prot database	PDB Select25	DisProt
	83.8	72.4	93.9	92.8	79.6	69.15	68.27	66.36

## Sheet: Fig.4G
% Proline residues	CPSF6 ΔLCR	CPSF6 ADD2 ΔLCR	CPSF6 WT	CPSF6 ΔFG	CPSF6 ΔFG ΔLCR	UniProtKB/Swiss-Prot database	PDB Select25	DisProt
	33.7	15.3	49	51.8	34.7	4.74	4.57	8.11

## Sheet: Fig.4H
% Charged residues	CPSF6 ΔLCR	CPSF6 ADD2 ΔLCR	CPSF6 WT	CPSF6 ΔFG	CPSF6 ΔFG ΔLCR	UniProtKB/Swiss-Prot database	PDB Select25	DisProt
	9.2	27.6	6.1	7.2	16.3	23.51	23.78	28.36
