# Supplementary material for: Decoding the biogenesis of HIV-induced CPSF6 puncta and their fusion with nuclear speckles
Source: eLife. 2026 Jan 6;13:RP103725. doi: 10.7554/eLife.103725 (PMC12774418; doi:10.7554/eLife.103725)
Supplement: Figure 5—source data 1. [file elife-103725-fig5-data1.xlsx]

## Sheet: Fig.5B
THP-1 KI ΔFG CPSF6 cl.44	THP-1 KI ΔFG CPSF6 cl.45	THP-1 KI ΔFG CPSF6 cl.59	THP-1 WT CPSF6	THP-1 KO CPSF6
0.336169	0.215584	0.691813	1	0

## Sheet: Fig.5C
WT	KO	ΔFG
100	60.5585	69.8765
100	70.3809	81.3927
100	69.212	58.9767
100	64.5989	85.1539

## Sheet: Fig.5D
WT	KO	ΔFG
100	14	7
100	15	7.6
100	29	25
100	28	25
