# Supplementary material for: Decoding the biogenesis of HIV-induced CPSF6 puncta and their fusion with nuclear speckles
Source: eLife. 2026 Jan 6;13:RP103725. doi: 10.7554/eLife.103725 (PMC12774418; doi:10.7554/eLife.103725)
Supplement: Figure 6—source data 1. [file elife-103725-fig6-data1.xlsx]

## Sheet: Sheet1
WT	ΔMCD-3xNLS	ΔLCR	ΔMCD-no NLS	ΔMCD-PY NLS
83.3333	80	80	66.6667	100
100	60	75	100	66.6667
100	100	100	100	100
100	100	100	80	100
100	100	100	100	75
100	100	90	100	100
100	100		100	57.1429
100	100	100	100	50
100	75	100	100	100
100	100	100	100	100
100	100	100	100	100
100	80	100	100	100
100	100	100	100	66.6667
75	100	100	83.3333	100
75	100	100	75	100
100	100	100	100	100
80	83.3333	100	100	0
100	71.4286	100	100	100
100	66.6667	50	100	100
75	80	100	100	100
100	100	100	100	80
100	100	100	100	100
100	88.8889		100	100
100	100	80	75	66.6667
66.6667	100	100	0	100
50	77.7778	100	100	100
50	100	50	100	100
100	100	100	100	100
100	100	100	80	0
100	100	100	83.3333	100
100	100	100	66.6667	100
100	100	100	100	85.7143
100	100	100	100	100
100	75	80	71.4286	100
100		100	100	100
80	100	100	100	100
75	100		100	100
100	100	85.7143	100	100
100	75	100	100	100
100	100	57.1429	100	100
100	100	100	100	0
100	100	100	100	100
66.6667	100	90	100	100
90	75	88.8889	100	75
100	100	100	100	100
100	66.6667	85.7143	100	100
100	100	85.7143	100	100
100	66.6667	100	100	100
100	100	85.7143	100	100
100	100	0	33.3333	100
90.9091	77.7778	100	100	100
50	100	83.3333	80	100
66.6667	100	71.4286	100	100
100	100	100	55.5556	100
100	100	100	100	100
100	80	60	100	100
100	100	100	50	100
100	100	100	100	100
100	58.3333	100	100	50
100	100	100	100	100
80	80	100	100	100
100	100	100	66.6667	100
100	100	100	100	100
100	66.6667	75	80	100
100	100	100	100	100
81.8182	100	87.5	80	100
100	100	72.7273	100	25
100	80	100	100	50
100	70	83.3333	100	100
100	50	100	100	0
100	75	100	100	100
75	100	100	50	100
100	66.6667	75	66.6667	66.6667
100	100	80	80	50
100	87.5	100	83.3333	100
100	66.6667	100	75	100
100	66.6667	100	50	100
100	100	100	100	50
100	85.7143	85.7143	100	100
100	66.6667	85.7143	100	83.3333
60	93.75	100	100	50
100	100	100	100	75
85.7143	100	100	40
100	100	83.3333	100
100	100	66.6667	100
100	100	100	100
100	100	84.6154	75
100	71.4286	86.6667	66.6667
80	100	100	100
100	75	66.6667	100
100	100	62.5	100
100	100	75	100
100	100	100	60
75	100	83.3333	100
85.7143	100	100	100
83.3333	100		100
80			0
100			100
100
100
