# Supplementary material for: Decoding the biogenesis of HIV-induced CPSF6 puncta and their fusion with nuclear speckles
Source: eLife. 2026 Jan 6;13:RP103725. doi: 10.7554/eLife.103725 (PMC12774418; doi:10.7554/eLife.103725)
Supplement: Figure 7—source data 1. [file elife-103725-fig7-data1.xlsx]

## Sheet: Fig.7B
	Isolated from NS	adjacent to NS	associated to NS
6h	27	12	61
9h	24	24	53
12h	18	13	69
30h	9	16	75

## Sheet: Fig.7C
6h	9h	12h	30h
4	3	6	7
5	5	3	5
0	0	0	0
0	0	0	0
0	0	0	0
0	0	0	0
0	0	0	0
0	0	0	6
0	0	0	9
0	0	1	0
0	0	18	0
0	1	0	1
0	0	0	0
0	0	0	0
0	0	0	0
0	0	0	0
0	0	3	0
0	0	0	3
0	0	0	7
1	0	0	0
0	0	0	0
0	0	0	2
0	0	1	2
0	0	1	1
0	0	0	12
0	0	0	1
0	0	0	4
0	0	0	1
0	0	0	0
1	2	0	0
10	0	0	0
14	0	0	0
0	0	1	4
0	0	4	3
0	0	0	0
0	2	0	0
0	3	0	0
0	0	0	0
0	0	0	0
0	0	0	6
0	1	3	3
0	2	0	0
0	0	0	0
0	0	0	1
0	0	0	1
0	0	0	0
0	0	0	1
0	0	0	10
0	0	8	0
0	0	7	0
0	1	1	0
0	1	0	3
2	0	0	3
0	0	0	0
0	0	0	0
0	0	3	0
0	0	0	0
0	1	0	5
0	0	0	7
0	0	0	1
1	0	0	0
0	0	0	4
0	7	5	4
0	2	0	7
0	0	0	5
0	0	0	0
0	0	0	8
0	0	0	3
0	0	0	4
0	0	0	5
2	1	0	0
0	0	0	2
0	0	0	4
0	0	0	0
0	0	0	0
0	0	0	0
0	0	0	0
0	0	0	4
6	0	0	7
2	1	0	0
0	0	0	0
0	0	0	0
0	0	0	0
0	0	0	0
5	0	0	0
1	0	0	0
0	0	0	2
0	0	0	5
0	0	6	8
0	0	7	1
0	0	2	1
0	0	1	0
0	4	0	0
0	1	0	0
0	0	0	0
0	0	0	2
0	0	0	0
0	0	0	1
0	0	1	0
0	0	0	0
7	0	0	0
0	0	0	0
0	0	0	0
0	0	0	0
0	0	0	0
0	0	0	0
0	0	0	0
0	0	5	0
0	2	1	0
0	0	0	5
0	0	2	2
0	0	0	1
0	0	4	2
0	1	0	2
0	0	0	2
	0	0	1
	0	0	2
	0	0	0
	0	0	0
	4	0
	0	0
	0	0
	0
	0
	0
