# Supplementary material for: Decoding the biogenesis of HIV-induced CPSF6 puncta and their fusion with nuclear speckles
Source: eLife. 2026 Jan 6;13:RP103725. doi: 10.7554/eLife.103725 (PMC12774418; doi:10.7554/eLife.103725)
Supplement: Figure 8—source data 1. [file elife-103725-fig8-data1.xlsx]

## Sheet: FANA SON-AbSON
Ctrl	SON
7652	5007.9
8401.8	1245.8
4653.6	1609
4466.4	1627.1
4090.8	1807.8
4672.9	3585.8
12607.1	1186.6
4567.6	1596.6
2652.2	2044.6
9487.1	2147
5040.2	1369.6
8056.2	2568.8
9041.3	4390.5
4997.4	7463.4
3379.1	584.5
8173.4	3135.9
4699.2	5674
4166.2	2204.7
4130.9	7743
6700.3	5364.3
6590.5	5598.8
11145.6	9860.5
5711.4	4640.8
4576.8	4688.2
7944.8	2228
4800.5	4041.7
6994.9	1123.2
4491	1031.8
3000.9	1520.2
5634.4	1151
5507.2	1925.3
6040.5	1990.9
4136.5	2882.4
8389.4	7572.6
9358.3	2892.6
14378.1	2616.5
12618.4	4647.5
12816.6	5731.7
13458.1	3336.1
21214.1	4464.9
13645	2934.9
10828.8	3659.2
13027.6	1925.4
3867.3	3487.8
5917.7	3871.9
3861.9	3071
3594.5	957.1
2762.7	2081.3
3679.8	2947.9
4506.8	12876.5
4561.5	2906.8
5460	2555.8
5345.1	3788.5
5388.6	3033
4096	5077.6
6193.2	3576.6
6767.1	2706.4
6016	4587
3714.7	7606
12101.9	3906.6
4258.3	4191.6
6922.1	1733.2
8344.4	2549.9
6801.1	5074.8
7536.7	4945.8
6359.1	2506.2
3402.5	2522.9
3571.8	2378.8
10265.9	2168
2787.4	3035.7
3075.8	2028.4
3302.3	3403.3
3788.4	1774.6
5871.7	2445.6
4326.9	1548.2
4503.2	2644.4
6290.5	1802.8
3179.2	1600.3
4838.3	2797.2
3960.1	2012.5
5104.2	1702.9
4055.9	5451.6
8214.4	4656.2
7479.7	4627.9
7708.5	7628.5
12766.9	4855.6
12347.6	2599.1
8787.4	2263.2
9922.6	4679.1
8513.1	2110.7
6165.7
8214.9
8660.1
9027.8
9974.7
10418.9

## Sheet: FANA SON-AbSRRM2
Ctrl	SON
1758.9	1250.6
2195.3	553.3
1007.2	497.4
976.7	682.7
1166.2	575.2
1023.2	738.5
2979.4	604.7
1115.3	773.9
782.3	852.6
2460.1	968.5
1173.1	733.4
1619.7	1568.2
1735.2	1522.8
1285.6	1585.4
1035	558.6
1686.3	1078
1338.8	1961.7
1196.2	1156.2
1066.2	2537
1407.8	1304.2
1544	1631.8
2191.8	3303.7
1571.1	1473.6
1083.6	1481.3
1929.9	1083.1
1019.7	1222.2
1560.8	522.4
1126.9	497.7
582	479.3
1267.9	559
1242.4	670.6
1182.3	762.5
1056.3	910.4
2030.7	950.3
1216.4	636.3
2624.7	891.8
2628	1168.6
2569.7	1527.7
2721.1	1388.6
4183.2	1368.4
2606.2	1099.2
1999.2	1185.9
2212.9	1259.1
801.8	1119.9
1228	1279.2
876.8	1075.7
924.9	634.9
746.5	992.7
754.7	1107.9
1276.1	2766.6
820.4	1220.8
1172.3	940
1117.4	1305
885.8	1233.1
899.8	1609.6
1360.6	1627
1237.4	1290.8
1107.9	1318.9
656.3	2188
2336	1235.8
973.7	1517.2
1258.4	1626.6
1683.4	1041.8
1292.2	2444.4
1378.6	1435.9
1361.3	1353.3
747.8
859.6
2137.9
729
623.9
632.4
792
969.4
678.1
813.5
1100
649.4
877.8
649.8
892.4
614.2
1701.5
1359.9
1462.3
2435.1
2318.9
1317.2
1779.2
1432.1
1345.6
1344.2
1495.3
1484.4
1548.6
1711.2

## Sheet: FANA SRRM2-AbSON
Ctrl	SRRM2
7652	15196.8
8401.8	6321.4
4653.6	2836.8
4466.4	11697.6
4090.8	10951.9
4672.9	2678.7
12607.1	4391.6
4567.6	3911.9
2652.2	12748.6
9487.1	4366.9
5040.2	7092.8
8056.2	3700.5
9041.3	4096.3
4997.4	12430.3
3379.1	6810.6
8173.4	6929.9
4699.2	7261.3
4166.2	4782.9
4130.9	8792.8
6700.3	13375.4
6590.5	6866
11145.6	6345.8
5711.4	8989.2
4576.8	7014
7944.8	5368.9
4800.5	5067.8
6994.9	5451
4491	5083.7
3000.9	6364.5
5634.4	15445.5
5507.2	2902.7
6040.5	2721.8
4136.5	11878.4
8389.4	11134.7
9358.3	4439.6
14378.1	3963.2
12618.4	4431.2
12816.6	7193.6
13458.1	3685.9
21214.1	12918.8
13645	4142.5
10828.8	12799.9
13027.6	12516.6
3867.3	6887.9
5917.7	7030.7
3861.9	7325.7
3594.5	4809.8
2762.7	6961.9
3679.8	8808.9
4506.8	6419.3
4561.5	13498.7
5460	8990.4
5345.1	7061.6
5388.6	3674.7
4096	6741.8
6193.2	7517.1
6767.1	5953
6016	7090.6
3714.7	5950.6
12101.9	10335.6
4258.3	10698.5
6922.1	6839.1
8344.4	9004.2
6801.1	7549.7
7536.7	5227.3
6359.1	6953.6
3402.5	6029.6
3571.8	5461.5
10265.9	8055.3
2787.4	9903.8
3075.8	6843.5
3302.3	5888.7
3788.4	8615.8
5871.7	9025.1
4326.9
4503.2
6290.5
3179.2
4838.3
3960.1
5104.2
4055.9
8214.4
7479.7
7708.5
12766.9
12347.6
8787.4
9922.6
8513.1
6165.7
8214.9
8660.1
9027.8
9974.7
10418.9

## Sheet: FANA SRRM2-AbSRRM2
Ctrl	SRRM2
1758.9	1033.9
2195.3	705.1
1007.2	356.7
976.7	1130.4
1166.2	762.1
1023.2	326.6
2979.4	570.8
1115.3	544.3
782.3	1266
2460.1	428.4
1173.1	698.9
1619.7	562.6
1735.2	536.4
1285.6	1013.4
1035	924
1686.3	658.9
1338.8	650.4
1196.2	381
1066.2	773.2
1407.8	1331.3
1544	844.8
2191.8	758.8
1571.1	916.9
1083.6	542.4
1929.9	672.8
1019.7	461.3
1560.8	684.4
1126.9	464.6
582	716
1267.9	1075.3
1242.4	362.9
1182.3	331.1
1056.3	1168.1
2030.7	774.3
1216.4	577.5
2624.7	552.2
2628	434.1
2569.7	710.6
2721.1	564.3
4183.2	1313.2
2606.2	542.4
1999.2	1523.6
2212.9	1028.3
801.8	938.8
1228	679.8
876.8	657.2
924.9	385.1
746.5	874.3
754.7	790.5
1276.1	772.6
820.4	1367
1172.3	934.4
1117.4	549.5
885.8	476.2
899.8	637
1360.6	692.6
1237.4	706.4
1107.9	616.7
656.3	730.1
2336	1185
973.7	1258.2
1258.4	1171.7
1683.4	668.2
1292.2	780.7
1378.6	538.9
1361.3	947.7
747.8	631
859.6	676.9
2137.9	1498
729	1640.6
623.9	632.7
632.4	500.1
792	1090.5
969.4	834.6
678.1
813.5
1100
649.4
877.8
649.8
892.4
614.2
1701.5
1359.9
1462.3
2435.1
2318.9
1317.2
1779.2
1432.1
1345.6
1344.2
1495.3
1484.4
1548.6
1711.2

## Sheet: Fig.8B
	Clusters%
Ctrl	78
SRRM2 KD	43
SON KD	66

## Sheet: Fig.8C
HEK293 HaloTag SRRM2	HEK293 ΔIDR HaloTag SRRM2
6	3
8	7
2	1
0	7
5	2
6	3
3	4
6	6
4	10
4	8
4	5
13	10
1	12
4	3
7	4
9	4
3	3
5	4
8	9
5	5
4	6
11	2
0	6
6	7
0	6
5	4
4	5
6	5
9	0
5	0
6	0
8	0
5	0
2	9
7	5
3	13
8	3
8	4
4	6
5	11
2	6
1	7
1	6
6	6
2	6
13	5
5	11
14	5
3	8
5	2
6	7
1	5
5	9
3	10
7	5
2	8
4	7
6	9
1	8
6	2
0	0
2	4
6	8
8	10
9	7
5	5
7	10
8	0
8	6
2	2
2	3
9	5
2	3
4	8
3	1
4	7
4	6
5	12
4	7
3	6
7	10
2	12
2	6
2	6
0	6
8	5
5	8
16	12
5	6
7	5
4	4
4	4
8	7
3	9
3	11
2	1
8	5
9	8
3	3
7	5
3	6
6	2
9	4
8	10
3	0
3	9
3	8
6	10
7	7
0	5
6	14
7	7
0	5
1	9
0	9
5	10
3	6
7	8
1	12
0	10
11	9
2	10
7	10
2	8
0	7
6	9
4	7
0	7
8	6
6	6
3	4
4	6
4	3
6	2
0	0
8	2
6	6
7	6
5	11
2	7
3	9
2	7
3	11
1	10
3	5
7	6
6	7
4	2
7	7
7	4
5	12
8	5
10	5
6	4
7	1
5	3
13	1
7	3
8	3
2	9
4	4
3	6
4	6
9	2
3	5
8	4
12	1
6	12
5	2
9	4
2	4
8	7
4	5
8	6
1	4
6	4
6	2
1	5
0	7
3	1
1	8
4	0
12	0
2	4
10	6
4	8
6	2
7	6
5	7
5	0
5	0
1	8
8	3
6	6
8	4
7	5
7	4
4	10
8	2
7	5
3	8
6	4
1	6
10	3
4	3
10	6
8	5
10	1
2	4
5	3
6	3
4	0
6	8
3	10
4	6
5	8
1	4
3	5
5	7
3	9
2	6
2	9
16	7
3	5
3	1
7	9
5	8
7	1
6	2
10	1
6
9
4
4
5
4
0
7
0
7
1
5
2
1
5
1
2
3
9
7
4
2
5
8
4
6
5
4
8
8
5
3
7
3
0
4
9
8
10
7
3
8
3
2
2
1
4
9
11
5
5
7
12
5
2
7
5
5
4
4
6
9
10
2
5
4
6
6
7
13
7
2
10
5
4
3
1
2
3
3
5
7
4
6
2
5
7
3
0

## Sheet: Fig.8D
HEK293T	HaloTag SRRM2	ΔIDR HaloTag SRRM2
18.1818	6.25	5
16.6667	20	10
23.0769	50	5.55556
18.1818	13.3333	11.1111
31.25	41.6667	15
36.3636	26.6667	31.5789
12.5	23.0769	9.52381
31.25	37.5	0
40	18.1818	6.25
30.7692	17.6471	6.25
35.7143	21.4286	6.25
36.3636	28.5714	8
44.4444	17.6471	0
12.5	5.55556	12.5
44.4444	57.1429	5.26316
36.3636	27.2727	10.5263
28.5714	16.6667	16.6667
7.69231	0	6.66667
33.3333	38.4615	12.5
16.6667	0	25
50	27.2727	20
6.66667	44.4444	0
11.7647	25	15.3846
46.1538	36.3636	21.4286
	62.5	25
	20	10.5263
	30	11.7647
	40	12.5
	42.8571	11.1111
		9.09091
		6.66667

## Sheet: SON KD & SRRM2 KD
Ctrl	SRRM2 KD		Ctrl	SON KD
1	0.464168		1	0.656464
