# Supplementary figures and images for: Decoding the biogenesis of HIV-induced CPSF6 puncta and their fusion with nuclear speckles
Source: eLife journal article supplement (doi:10.7554/elife.103725), 2024-12-27

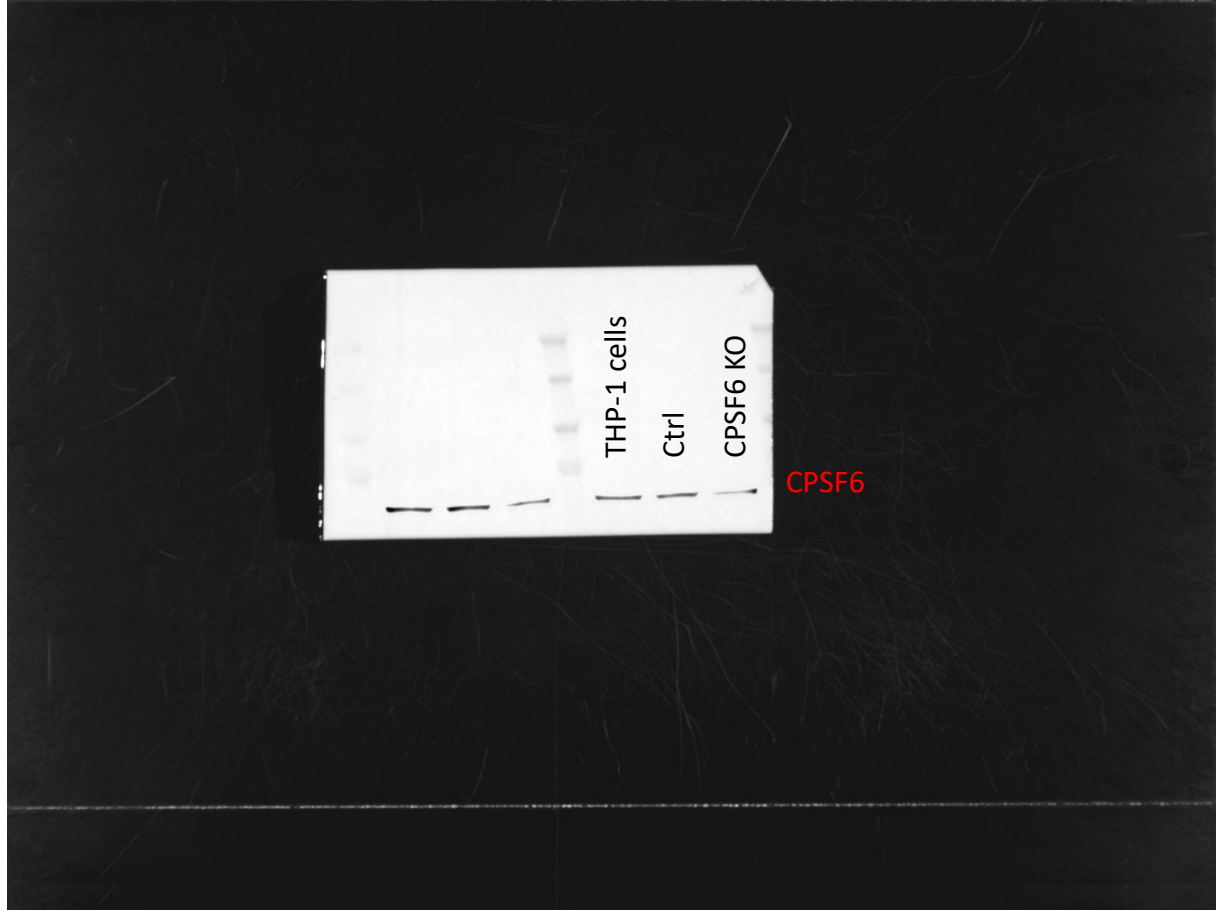

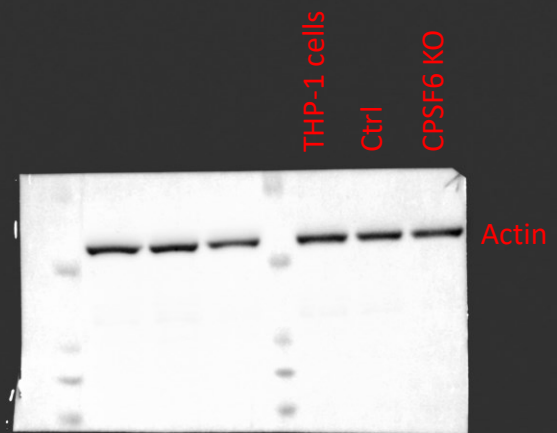

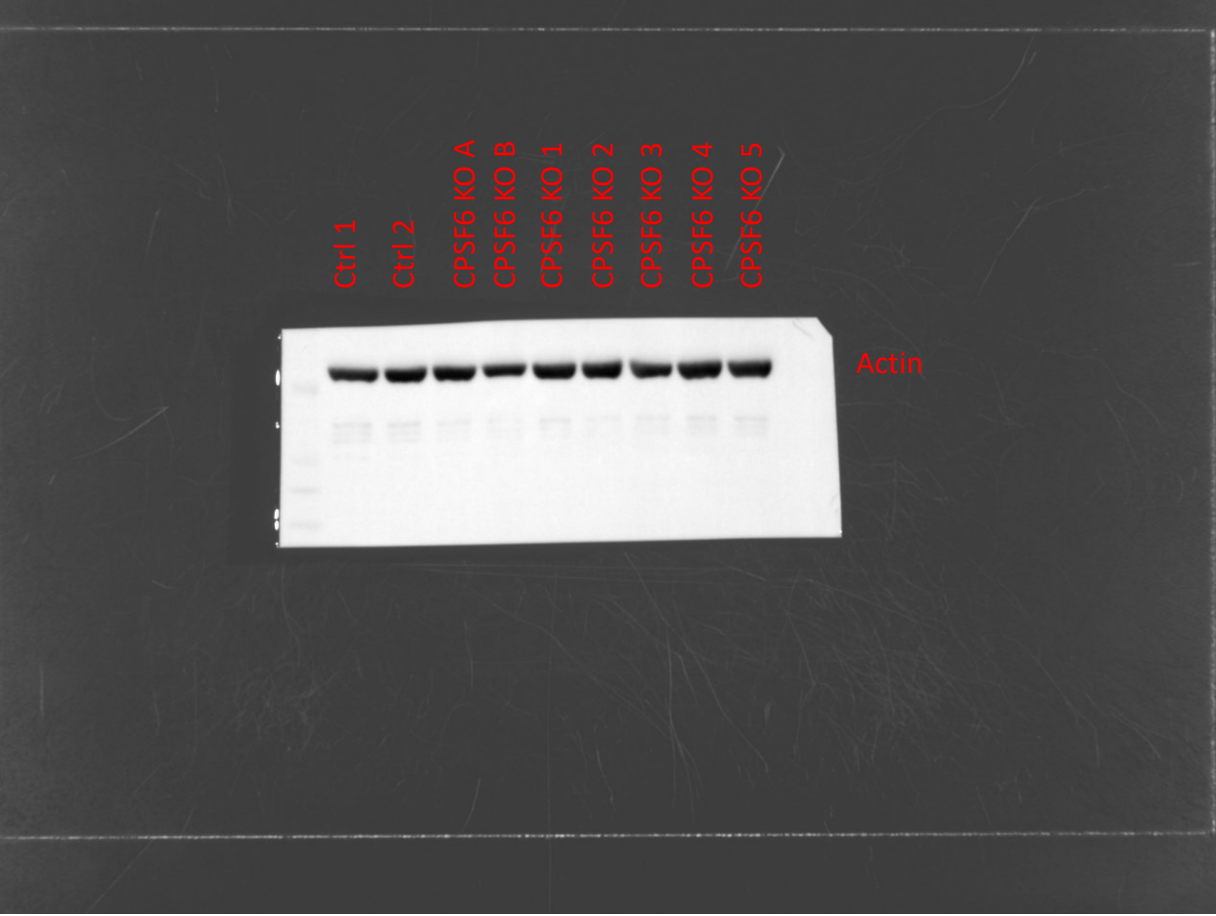

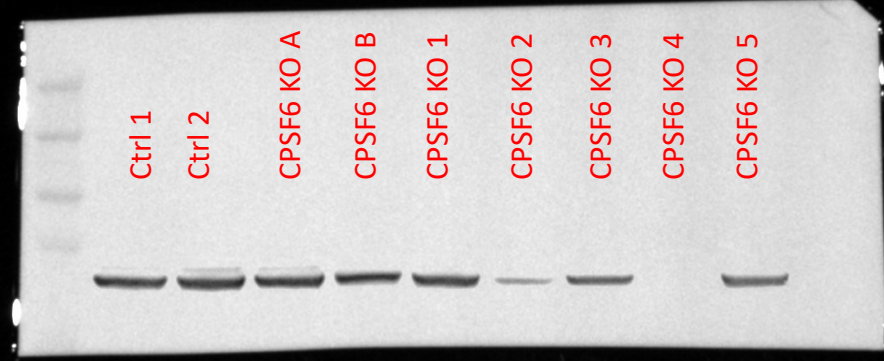

CPSF6

Supplement: fig1-data4 [file Figure 1C-WB with annotations.pdf › Figure 1-source data 4/Figure 1C-WB with annotations.pdf]

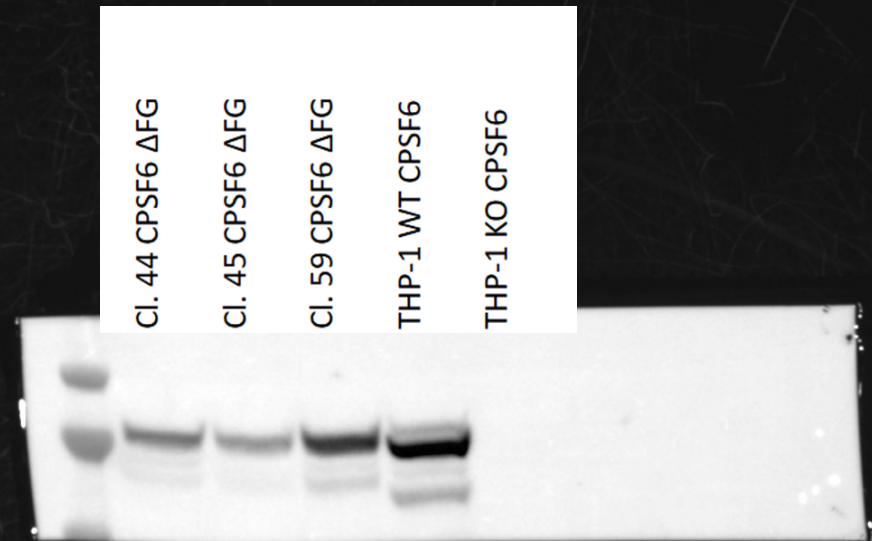

CPSF6

Cl. 44 CPSF6  $\Delta$ FG

Cl. 45 CPSF6  $\Delta$ FG

Cl. 59 CPSF6  $\Delta$ FG

THP-1 WT CPSF6

THP-1 KO CPSF6

Actin

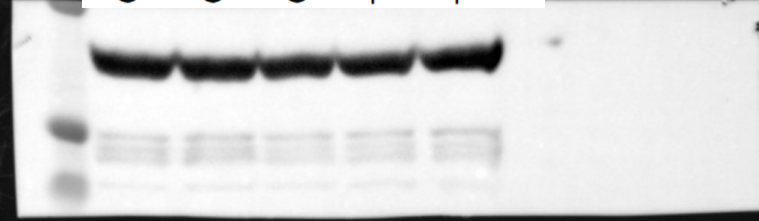

Supplement: fig5-data3 [file Figure 5A annotated.pdf › Figure 5-source data 3/Figure 5A annotated.pdf]

Actin

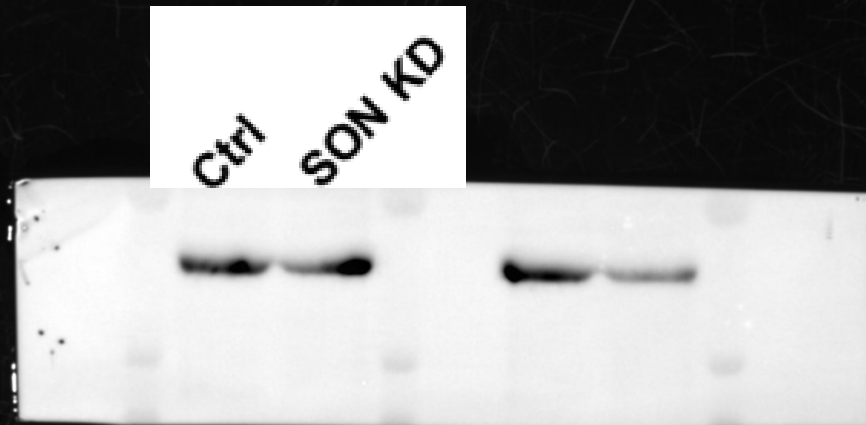

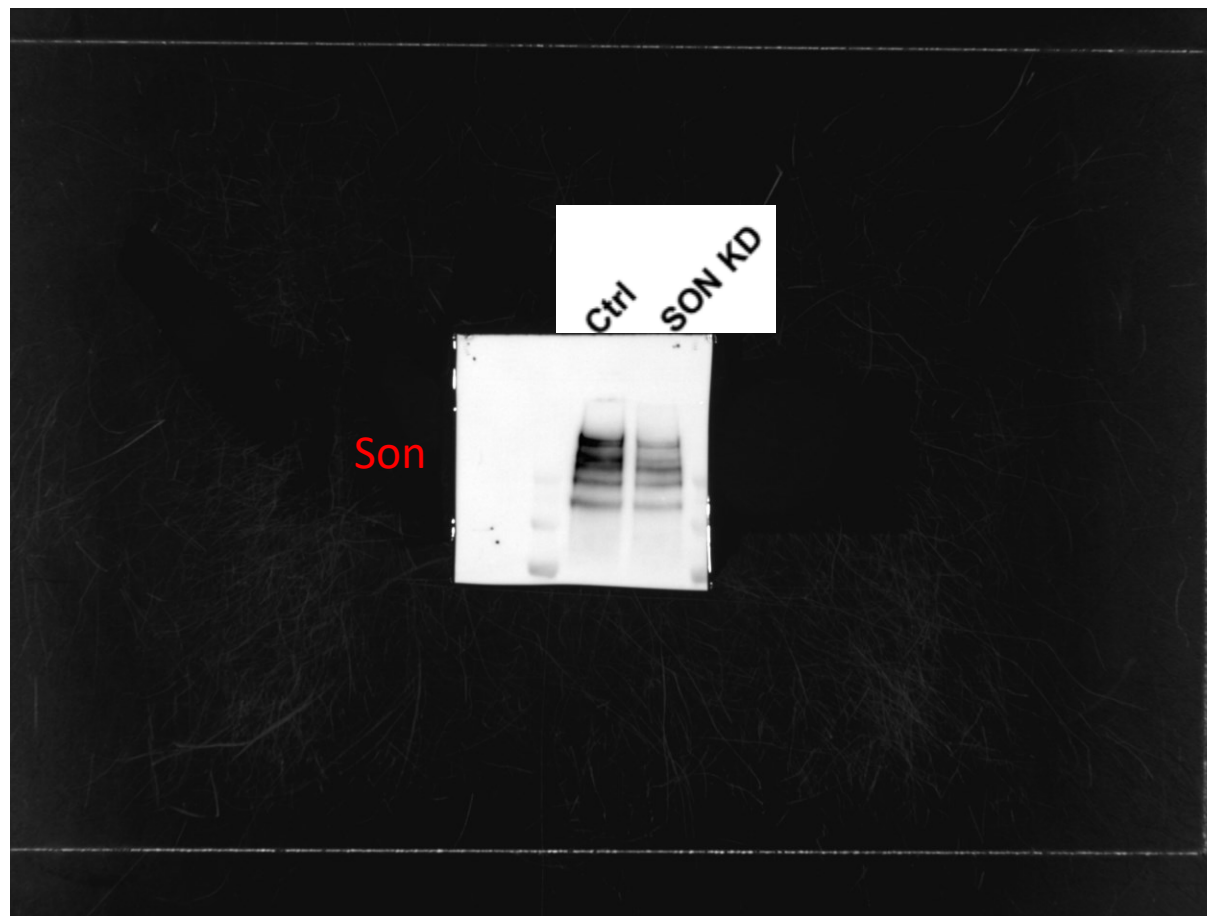

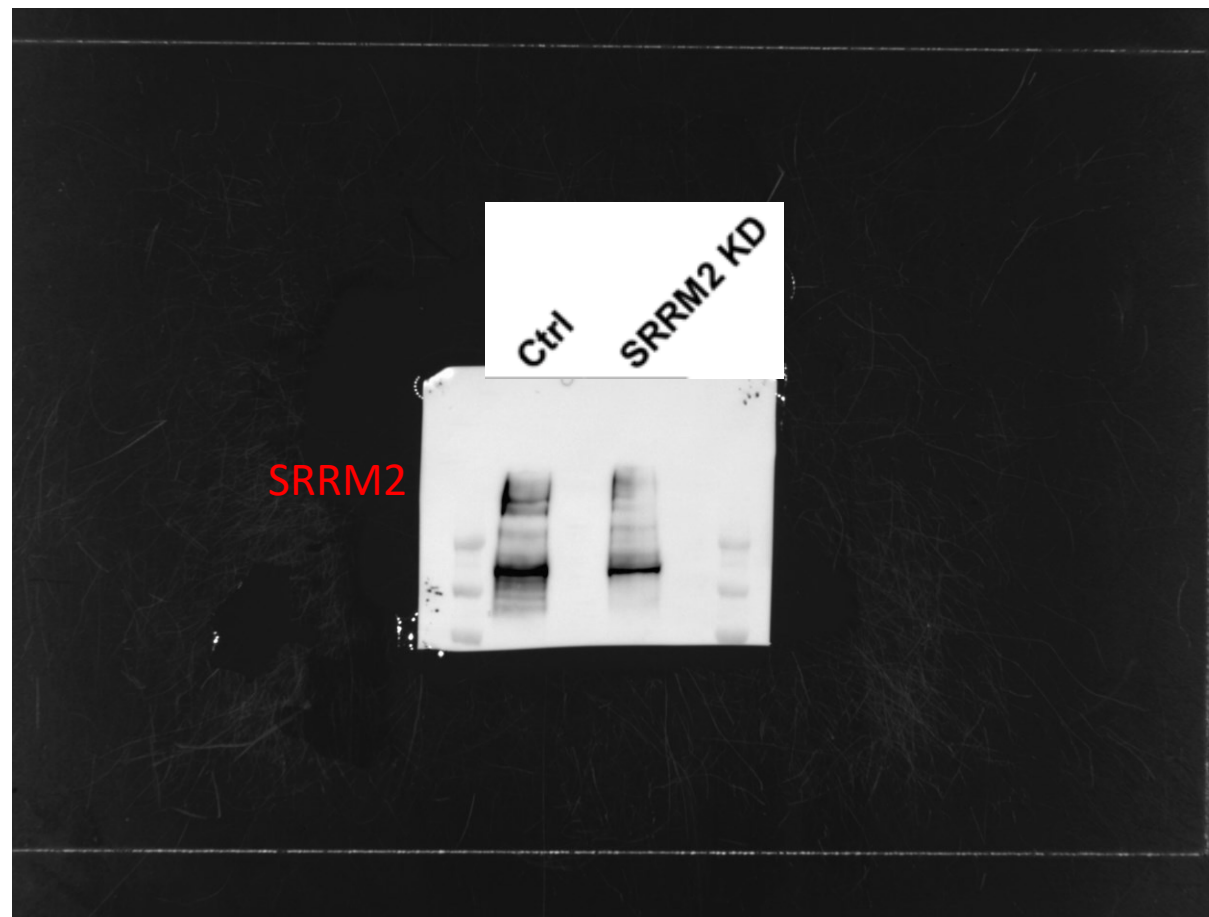

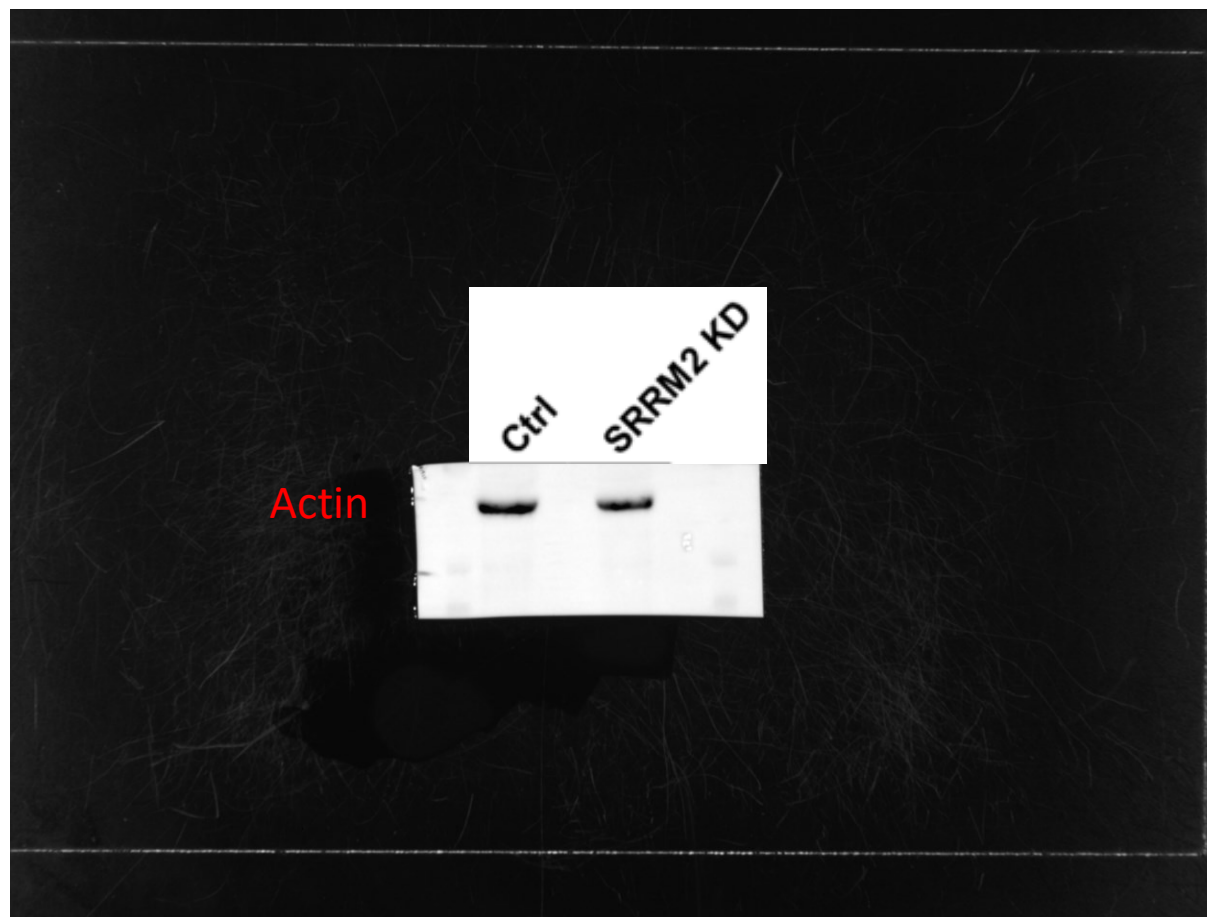

Supplement: fig8-data4 [file Figure 8A-annotated.pdf › Figure 8-source data 4/Figure 8A-annotated.pdf]
